# Supplementary material
Source: PubMed Central journal article supplement (PMC1783416)

**A**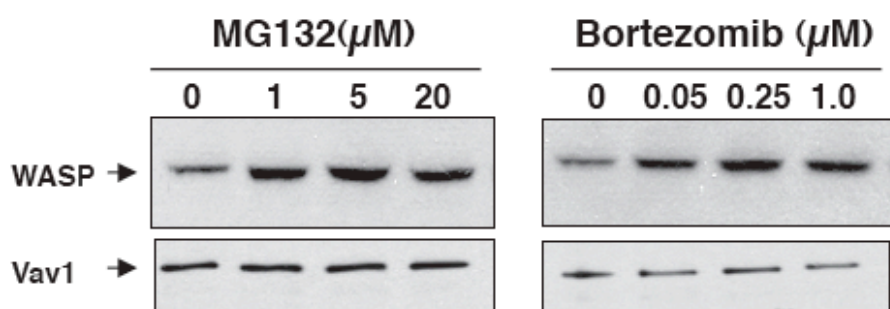**B**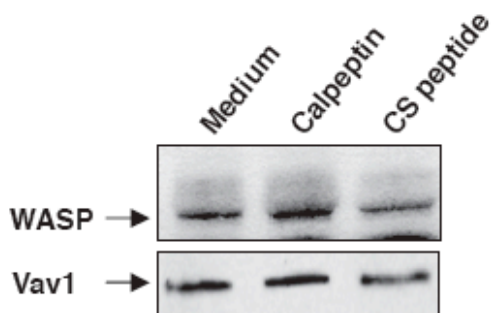**C**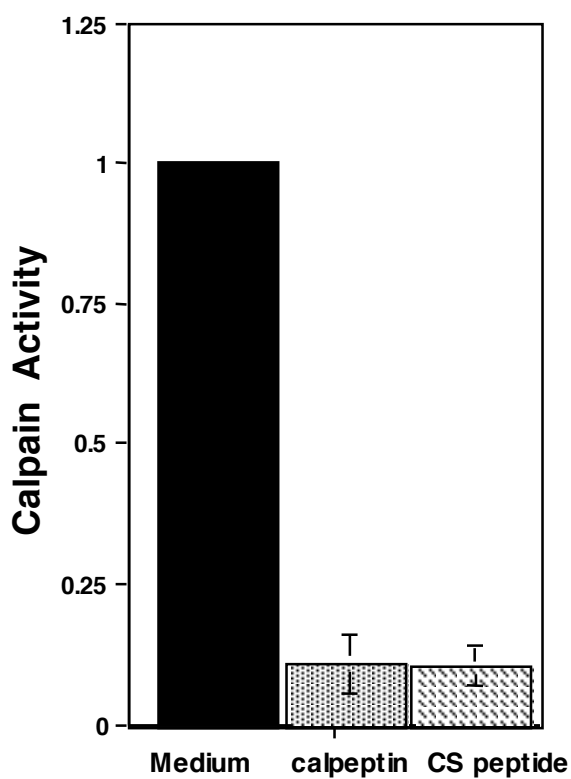

Supplement: pnas_0610275104_2.pdf [file pnas_0610275104_2.pdf]
